# Supplementary material for: InvertypeR: Bayesian inversion genotyping with Strand-seq data
Source: PubMed Central journal article supplement (PMC8325862; doi:10.1186/s12864-021-07892-9), 2021-07-31

HG00512  
GRCh38

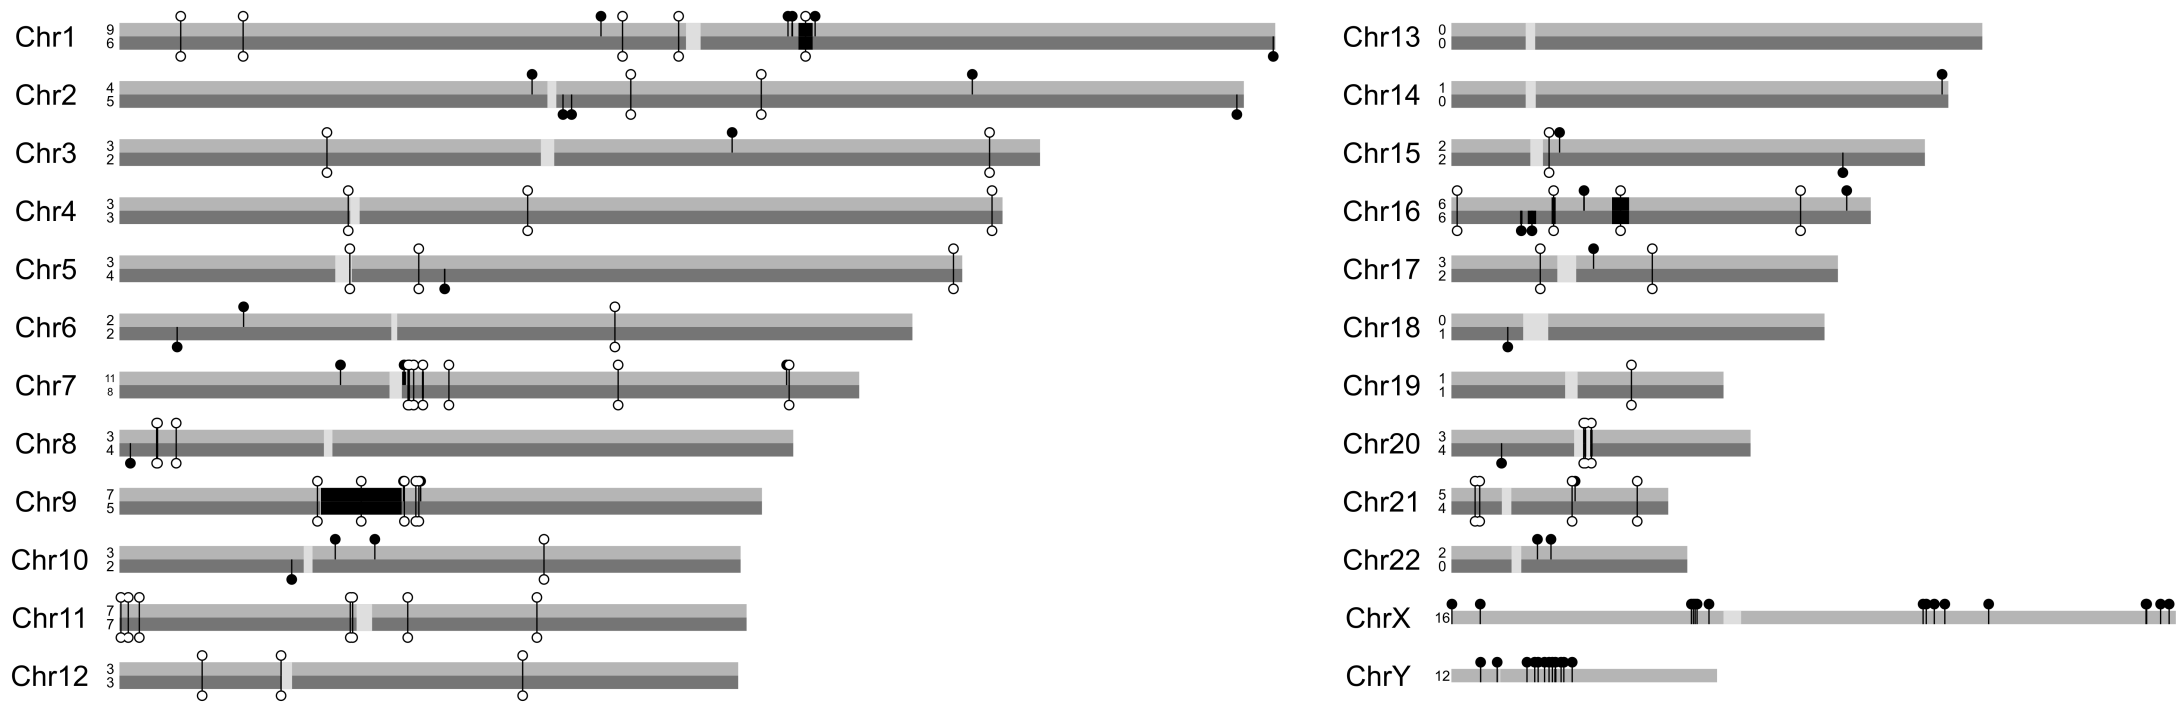

Supplement: 12864_2021_7892_MOESM2_ESM.pdf [file 12864_2021_7892_MOESM2_ESM.pdf]
